# Supplementary material for: A comparative study on the allergenic potential of β-lactoglobulin conjugated to glucose, caffeic acid and caffeoyl glucopyranose
Source: Royal Society of Chemistry journal article supplement (doi:10.1039/d3fo00195d), 2023-01-01
Supplement: d3fo00195d1.pdf [file d3fo00195d1.pdf]

**Table S1.** Anaphylactic Symptom Scoring

| Score | Symptoms                                                                                     |
|-------|----------------------------------------------------------------------------------------------|
| 0     | No symptoms                                                                                  |
| 1     | Scratching nose and mouth                                                                    |
| 2     | Swelling around the eyes and mouth; pillar erection; reduced activity; higher breathing rate |
| 3     | Shortness of breath; blue rash around the mouth and tail; higher breaching rate              |
| 4     | No activity after stimulation, shivering and muscle contractions                             |
| 5     | Death by shock                                                                               |

**Table S2.** Structural characterization of BLG, LG-Glu, LG-CA and LG-CG

| Sample | Polyphenes bound (mg/g protein) | Free amino acid (mg/mL) | Tyrosine group (mg/mL)  |
|--------|---------------------------------|-------------------------|-------------------------|
| BLG    | -                               | 0.076±0.00 <sup>a</sup> | 0.024±0.00 <sup>a</sup> |
| LG-Glu | -                               | 0.052±0.00 <sup>b</sup> | 0.019±0.00 <sup>b</sup> |
| LG-CA  | 35.38±0.49 <sup>a</sup>         | 0.059±0.00 <sup>c</sup> | 0.014±0.00 <sup>c</sup> |
| LG-CG  | 34.60±1.45 <sup>a</sup>         | 0.068±0.00 <sup>d</sup> | 0.021±0.00 <sup>d</sup> |

**Table S3.** Gut flora  $\alpha$ -diversity of BLG, LG-Glu, LG-CA and LG-CG group

| Sample  | Chao                       | Sobs                       | Ace                       | Coverage                 |
|---------|----------------------------|----------------------------|---------------------------|--------------------------|
| Control | 295.47±17.10 <sup>a</sup>  | 261.33±18.03 <sup>a</sup>  | 290.57±13.20 <sup>a</sup> | 0.9987±0.00 <sup>a</sup> |
| BLG     | 296.91±14.40 <sup>a</sup>  | 268.33±16.01 <sup>a</sup>  | 288.93±9.87 <sup>a</sup>  | 0.9983±0.00 <sup>a</sup> |
| LG-Glu  | 349.07±30.57 <sup>b</sup>  | 322.67±17.62 <sup>b</sup>  | 340.87±14.78 <sup>b</sup> | 0.9988±0.00 <sup>a</sup> |
| LG-CA   | 338.93±15.59 <sup>b</sup>  | 308.00±47.00 <sup>ab</sup> | 334.06±16.55 <sup>b</sup> | 0.9985±0.00 <sup>a</sup> |
| LG-CG   | 336.27±12.40 <sup>ab</sup> | 311.00±18.36 <sup>b</sup>  | 330.41±15.47 <sup>b</sup> | 0.9985±0.00 <sup>a</sup> |
